# Retraction: MicroRNA-613 inhibits cell growth, migration and invasion of papillary thyroid carcinoma by regulating SphK2

Wangwang Qiu<sup>1,\*</sup>, Zhili Yang<sup>1,\*</sup>, Youben Fan<sup>1</sup> and Qi Zheng<sup>1</sup>

<sup>1</sup>Department of General Surgery, Shanghai Jiao Tong University Affiliated Sixth People's Hospital, Shanghai 200233, P.R. China

\*These authors contributed equally to this work

**Published:** December 31, 2025

**Copyright:** © 2025 Qiu et al. This is an open access article distributed under the terms of the [Creative Commons Attribution License](#) (CC BY 4.0), which permits unrestricted use, distribution, and reproduction in any medium, provided the original author and source are credited.

**This article has been retracted:** Oncotarget has concluded its investigation of the paper following feedback from our readers. We found multiple overlaps and duplications in the published figures, detailed below:

Figure 2C K1 cells transfected with miR-C (K1/miR-C) migration image overlaps with Figure 5C K1/miR-C cells migration, representing different experiment.

Figure 2D TPC-1/miR-C cells migration image overlaps with Figure 5D TPC-1/miR-C cells migration image, representing different experiment.

Figure 5C K1/miR-C cells invasion image overlaps with Figure 5C/miR-C cells migration image.

Figure 5C K1/miR-613 + pcDNA3.1/SphK2 migration image overlaps with Figure 5C K1/miR-613 + pcDNA3.1/SphK2 cells invasion image.

Figure 5D TPC-1/miR-C migration image overlaps with Figure 5D TPC-1/miR-C cells invasion image.

Figure 5D TPC-1/miR-613 invasion image overlaps with Figure 5D TPC-1/miR-613+ pcDNA3.1/SphK2 cells migration image, later corrected.

Figure 5C K1/miR-C cells invasion image overlaps with BCPAP cells transfected with anti-miR-613 invasion image in Supplementary Figure1C.

Figure 5D migration and invasion images (control and miR-613-transfected TPC-1 cells) were reproduced in an unrelated 2018 paper [1] Figure 3C, referring to a different experiment in a different cell line.

Additionally, 6 and 5 tumor images from Figure 3C later appeared in Figure 2E of [2] and Figure 6B of [3], respectively. Both [2] and [3] have since been retracted.

Based on the findings of this investigation, the Oncotarget Editors have decided to retract the article. The authors have been notified of this decision.

Original article: Oncotarget. 2016; 7:39907–39915. <https://doi.org/10.18632/oncotarget.9530>

## REFERENCES

1. Ding S, Qu W, Jiao Y, Zhang J, Zhang C, Dang S. LncRNA SNHG12 promotes the proliferation and metastasis of papillary thyroid carcinoma cells through regulating wnt/ $\beta$ -catenin signaling pathway. Cancer Biomark. 2018; 22:217–26. <https://doi.org/10.3233/CBM-170777>. [PubMed]
2. Ye J, Zhang W, Liu S, Liu Y, Liu K. miR-363 inhibits the growth, migration and invasion of hepatocellular carcinoma cells by regulating E2F3. Oncol Rep. 2017; 38:3677–84. <https://doi.org/10.3892/or.2017.6018>. [PubMed]. Retraction in: Oncol Rep. 2021; 46:230. <https://doi.org/10.3892/or.2021.8181>. [PubMed]
3. Jing H, Xia H, Qian M, Lv X. Long noncoding RNA CRNDE promotes non-small cell lung cancer progression via sponging microRNA-338-3p. Biomed Pharmacother. 2019; 110:825–33. <https://doi.org/10.1016/j.biopha.2018.12.024>. [PubMed]. Retraction in: Biomed Pharmacother. 2025; 118883. <https://doi.org/10.1016/j.biopha.2025.118883>. [PubMed]
